# Supplementary material for: Climate Change Is Driving Shifts in Dragonfly Species Richness across Europe via Differential Dynamics of Taxonomic and Biogeographic Groups
Source: MDPI journal article supplement (doi:10.3390/d14121066), 2022-12-03
Supplement: s1 [file s1]

Archive with 1 entries (1 files):
- diversity-1951426-supplementary.pdf
