# Supplementary material for: Climate Change Is Driving Shifts in Dragonfly Species Richness across Europe via Differential Dynamics of Taxonomic and Biogeographic Groups
Source: MDPI journal article supplement (doi:10.3390/d14121066), 2022-12-03
Supplement: s1 [file s1 › diversity-1951426-supplementary.pdf]

# **Climate change is driving shifts in dragonfly species richness across Europe via differential dynamics of taxonomic and biogeographic groups**

**Kent Olsen <sup>1,\*</sup>, Jens-Christian Svenning <sup>2,3,4</sup> and Henrik Balslev <sup>2</sup>**

<sup>1</sup> Research and Collections, Natural History Museum Aarhus, Wilhelm Meyers Allé 10, DK-8000 Aarhus, Denmark

<sup>2</sup> Section for Ecoinformatics and Biodiversity, Department of Biology, Aarhus University, Ny Munkegade 116, DK-8000 Aarhus, Denmark

<sup>3</sup> Center for Biodiversity Dynamics in a Changing World, Department of Biology, Aarhus University, Ny Munkegade 116, DK-8000 Aarhus, Denmark

<sup>4</sup> Center for Sustainable Landscapes under Global Change, Department of Biology, Aarhus University, Nordre Ringgade 1, DK-8000 Aarhus, Denmark

\* Correspondence: kent@nathist.dk; Tel.: +45-40272030

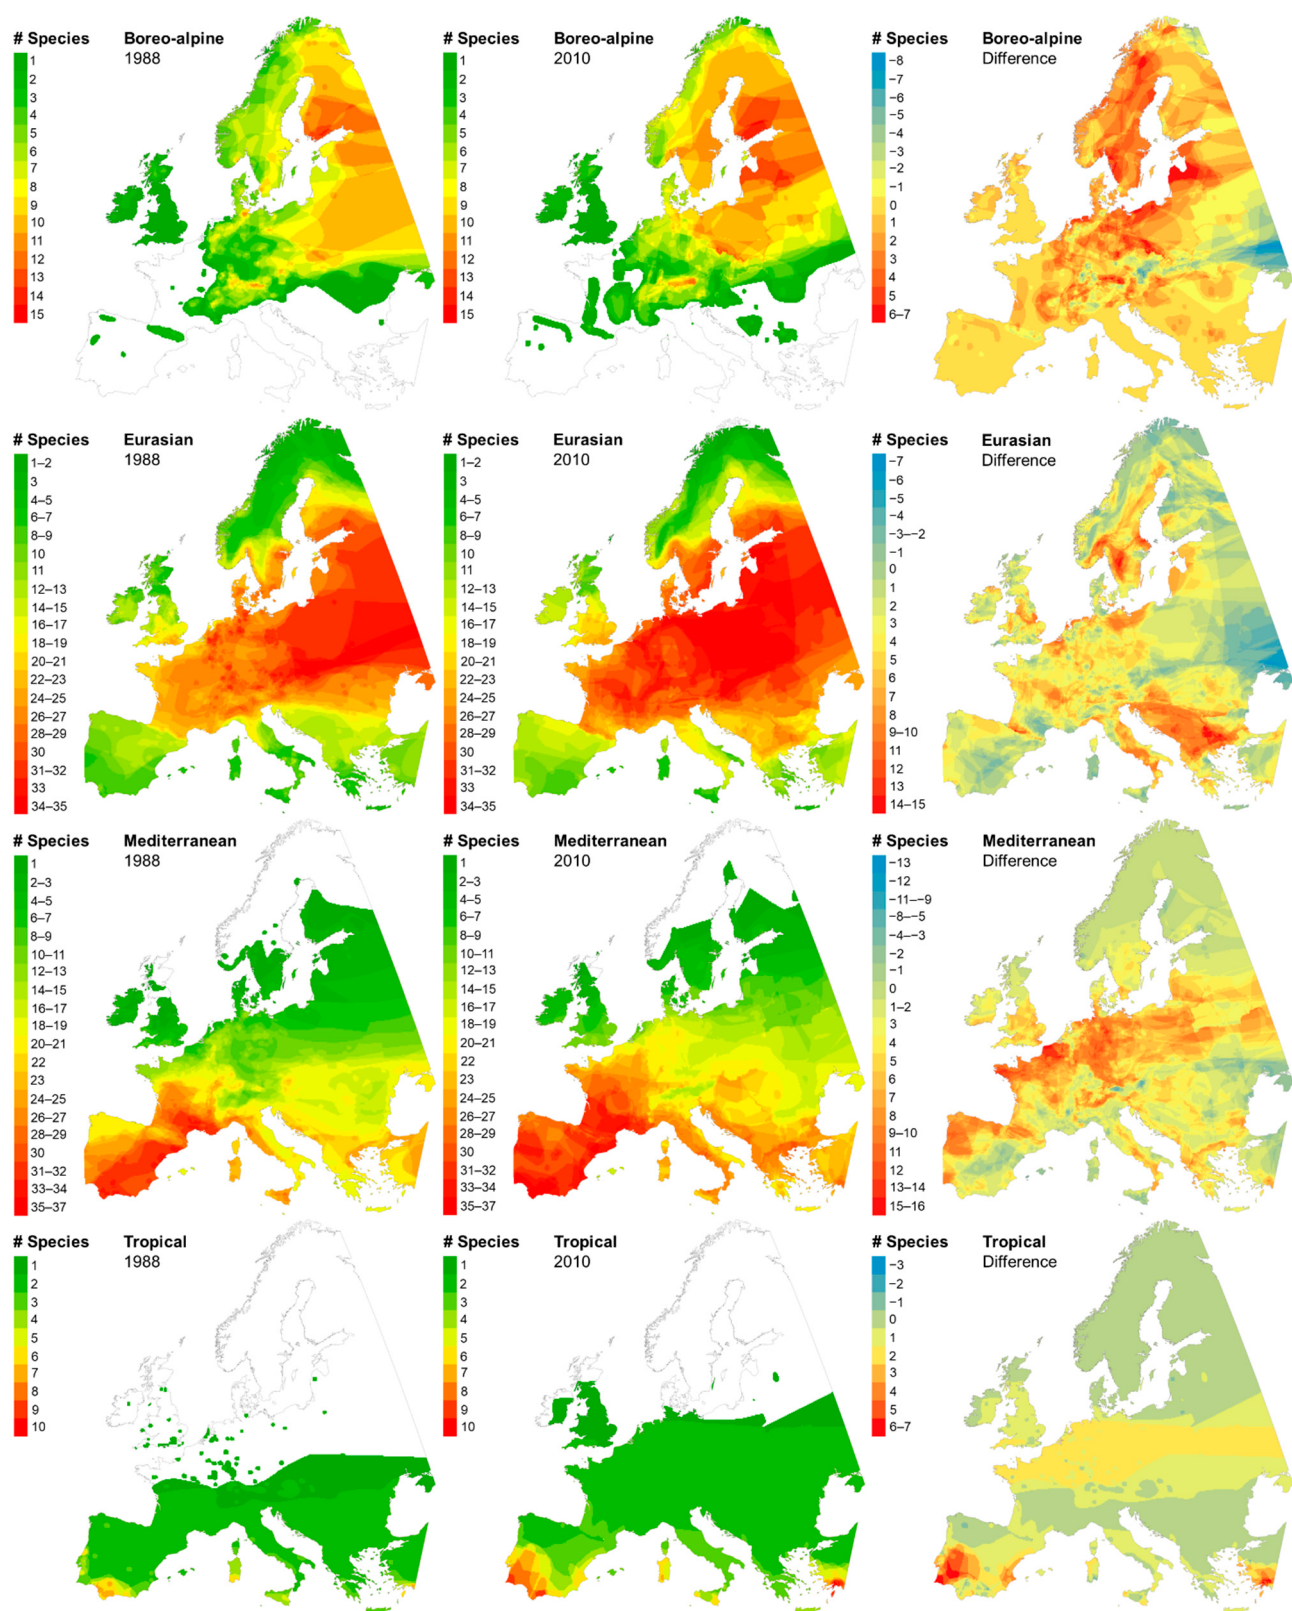

**Figure S1.** Geographical patterns of European dragonfly (Odonata) species richness and changes by biogeographical groups. Observed species richness in 1988 according to Askew [49] (left column), observed species richness in 2010 according to Kalkman et al. [34] (middle column), difference in observed species richness between 1988 and 2010 (negative value: decrease and positive value: increase in species richness, respectively) (right column). European data presented by biogeographical groups (Tropical, Mediterranean, Eurasian, and Boreo-alpine) at 10 km × 10km grid resolution.

**Table S1.** List of European dragonfly (Odonata) species which (1) have been excluded from the analysis, (2) where modifications to species range have been applied, (3) that colonized Europe after 1988, and (4) with taxonomic and nomenclatural changes between 1988 and 2010. Nomenclature and taxonomy follow IUCN [80].

### 1) Species that have been excluded in the analysis

---

#### *Anax ephippiger*

An obligate Afro-tropical migrant which expands north with the seasonal monsoon fronts [50]. It has a huge range and reproduces only temporarily in the Palearctic (northern Africa, Europe, central and southern Asia). It does not occur annually in most of the European range.

#### *Anax immaculifrons*

No distribution map included in Askew [49], only in Dijkstra and Lewington [50] and Kalkman et al. [34]. Found in south Turkey, Cyprus, and the Greek islands of Rhodes, Kárpáthso and Ikaria.

#### *Anax junius*

Is a trans-Atlantic vagrant with no established European populations [50].

#### *Gomphus ubadschii*

*G. ubadschii* used to be considered a subspecies of *G. flavipes* and both were included in the same distribution map in Askew [49]. Within our study area it is only found in very restricted areas in the western half of Anatolia [34,50].

#### *Libellula pontica*

Only included with distribution maps in Dijkstra and Lewington [50], but not in Askew [49] and Kalkman et al. [34]. Found only in a small area within our study area in northern Turkey.

#### *Onychogomphus assimilis*

Only included with distribution maps in Dijkstra and Lewington [50], but not in Askew [49] and Kalkman et al. [34]. Found only in a small area within our study area in southern Turkey.

#### *Onychogomphus flexuosus*

Only included with distribution maps in Dijkstra and Lewington [50], but not in Askew [49] and Kalkman et al. [34]. Found only in a small area within our study area in southern Turkey.

#### *Somatochlora borisi*

First discovered in 1999 and thus not included in Askew [49], and so far, found only in a very restricted area in the south-eastern Balkans [34,50].

### 2) Species in which range maps have been modified

---

#### *Aeshna subarctica*

A large part of Belarus was missing in the 2010 data. However, according to the map in Dijkstra and Lewington [50] this is erroneous, and that area has thus been added to the range of this species.

#### *Aeshna viridis*

A large part of Belarus and the freshwater lake, Ladoga east of Saint Petersburg was missing in the 2010 data. However, according to the map in Dijkstra and Lewington [50] this is erroneous, and that area has thus been added to the range of this species.

#### *Calopteryx xanthostoma*

Records from Sardinia included in Askew [49] are reported by Boudot et al. [71] to be erroneous and have thus been omitted from the analysis.

#### *Ceragrion tenellum*

*C. georgifreyi* used to be considered a subspecies of *C. tenellum* and both taxa were thus included in the same distribution map in Askew [49]. Both are now considered good species and their ranges are not known to overlap [50]. Consequently, the range of *C. georgifreyi* per 1988 was removed from the original *C. tenellum* map.

### ***Ceriagrion georgifreyi***

*C. georgifreyi* used to be considered a subspecies of *C. tenellum* and both taxa were thus included in the same distribution map in Askew [49]. Both are now considered good species and their ranges are not known to overlap [50]. Consequently, the range of *C. georgifreyi* per 1988 was drawn based on the original *C. tenellum* map.

### ***Chalcolestes viridis* / *Chalcolestes parvidens***

*C. parvidens* used to be considered a subspecies of *C. viridis* and both were included in the same distribution map in Askew [49]. Both are now considered good species and as their ranges are known to overlap substantially, the maps of both taxa per 2010 were combined in order to compare it with the 1988 maps which include both species in one map.

### ***Coenagrion hylas***

The population in Germany went extinct in the mid-1960s whereas the population in western Austria remains [49,50]. The map from 1988 have been updated to include the Austrian range as it is mentioned within the text, but not specified in the map whereas the extinct population has been omitted.

### ***Coenagrion intermedium***

Included in the same distribution map as *C. puella* in Askew [49], but as *C. intermedium* according to Dijkstra and Lewington [50] replaces *C. puella* in Crete and their distributions are not known to overlap, the range of *C. intermedium* per 1988 was drawn based on the original *C. puella* map.

### ***Cordulegaster boltonii***

*C. trinacriae* used to be considered a subspecies of *C. boltonii* and was thus included in the same distribution map in 1988 [49]. Both are now considered good species and as their ranges are not known to overlap as *C. trinacriae* replaces *C. boltonii* in Italy south of Rome [50], the range of *C. trinacriae* was removed from the original *C. boltonii* map in 1988.

### ***Cordulegaster helladica***

Three weakly differentiated subspecies have been described, namely *C. helladica helladica*, *C. h. buccholzi*, and *C. h. kastalia*. The ranges of all three subspecies are combined within one map in 2010 as *C. helladica*. Askew [49] presented *C. helladica* in the same distribution map as *C. picta*, but as their distributions are not known to overlap according to Dijkstra and Lewington [50], the range of *C. helladica* per 1988 was drawn based on the original *C. picta* map.

### ***Cordulegaster picta***

Askew [49] presented *C. helladica* in the same distribution map as *C. picta*, but as their distributions are not known to overlap according to Dijkstra and Lewington [50], the range of *C. helladica* was removed from the original *C. picta* map in 1988.

### ***Cordulegaster trinacriae***

Included in the same distribution map as *C. boltonii* in Askew [49], but as *C. trinacriae* replaces *C. boltonii* in Italy south of Rome [50], the range of *C. trinacriae* per 1988 was drawn from the original *C. boltonii* map.

### ***Lestes sponsa***

Records from Crete, Andalusia and Maghreb included in Askew [49] are considered erroneous [71] and thus omitted from the map in 1988.

### ***Libellula fulva***

A large part of Czech Republic and all of Belarus was missing in the 2010 data. However, according to Dijkstra and Lewington [50] this is erroneous and both areas have thus been added to the range of this species.

### ***Onychogomphus forcipatus***

Three weakly differentiated subspecies have been described, namely *O. f. forcipatus*, *O. f. albotibialis*, and *O. f. unguiculatus* [50]. The ranges of all three subspecies have been combined in the 2010 map of *O. forcipatus*.

### ***Orthetrum cancellatum***

A large part of Belarus was missing in the 2010 data. However, according to maps in Dijkstra and Lewington [50] this is erroneous, and that area has thus been added to the range of this species.

### ***Orthetrum coerulescens* / *Orthetrum ramburii***

The southern ssp. *anceps* was once considered a good species, formerly called *O. ramburii* [49], but as intermediate individuals occur in large areas this seems unjustified, and they are thus considered to be two subspecies [50]. For the analysis, the two maps from 1988 where they were treated as separate species have been combined in order to allow a direct comparison to the distribution per 2010, which include both subspecies in one map.

#### *Pantala flavescens*

Single records from Spain and France which were originally included in Askew [49] have been omitted as they are now believed to have been based on a misinterpretation of French literature by Aguesse [78]. The species is considered to be at least partly ship assisted in the west Mediterranean area [50].

#### *Pyrrhosoma nymphula* / *Pyrrhosoma elisabethae*

*P. elisabethae* used to be considered a subspecies of *P. nymphula* [49]. For the analysis, in 2010 the ranges of the two taxa were combined in order to compare with the 1988 maps which include both species in one map. However, it makes very little difference, as compared with the large distribution of *P. nymphula*, *P. elisabethae* is currently known from only a small number of localities on the Peloponnese, Kérkira (Corfu) and southern Albania [50].

#### *Sympetrum pedemontanum*

The distribution in 2010 included parts of the Baltic Sea and the Black Sea. These erroneous parts of the range were removed in the analysis by using the European coastline.

#### *Sympetrum striolatum* / *Sympetrum nigrescens*

*S. nigrescens* from the Atlantic coast of Ireland, Scotland and Norway has been considered a good species [49], but molecular work has showed that the genetic distance between *S. striolatum* and *S. nigrescens* is small and fall in the range of within-species variation [79]. The two maps from 1988 where they were treated as separate species have been combined in order to allow a direct comparison with the distribution per 2010, which included both taxa as subspecies. Additionally, all of Belarus was missing in the 2010 data. However, according to Dijkstra and Lewington [50] this is erroneous, and that area has thus been added to the range of the species in 2010.

#### *Trithemis festiva*

No distribution map for this species was included in Askew [49] but in the text it was noted as occurring on Rhodes and Cyprus and we have added this area to the range per 1988. In 2010 it also occurs in a small area within our study area in southern Turkey.

### **3) Species which in 2010 have been included as new in Europe**

---

#### *Ischnura fountaineae*

No distribution map for this species was included in Askew [49], and within Europe it currently occurs only on the Italian island Pantelleria southwest of Sicily [34,50].

#### *Orthetrum sabina*

No distribution map for this species was included in Askew [49] and the text states that it does not penetrate into Europe west of the Caucasus. However, it is included both in Dijkstra and Lewington [50] and Kalkman et al. [34] with a range along the Turkish Mediterranean coast and some Greek islands.

#### *Orthetrum taeniolatum*

No distribution map for this species was included in Askew [49] and the text states that its distribution only very nearly extends into Europe. However, it is included both in Dijkstra and Lewington [50] and Kalkman et al. [34] with a range along the Turkish Mediterranean coast and some Greek islands.

#### *Trithemis kirbyi*

No distribution map for this species was included in Askew [49] and it does not seem to occur within our study area per 2006 [50]. However, by 2010 it has jumped from North Africa to Sardinia [34].

### **4) Species with changes in taxonomy or scientific name**

---

#### *Brachythemis impartita*

---

The taxon *B. leucosticta* included in Askew [49] was believed to feature two morphotypes, that are now considered to represent separate species where *B. impartita* is the one found in Europe [50] and thus the one included in this work.

***Chalcolestes viridis* / *Chalcolestes parvidens***

*C. parvidens* used to be considered a subspecies of *C. viridis* and both were thus included in the same distribution map in 1988 [49]. They were both formerly in the genus *Lestes*.

***Ceriagrion tenellum* / *Ceriagrion georgifreyi***

*C. georgifreyi* used to be considered a subspecies of *C. tenellum* and both were thus included in the same distribution map in 1988 [49].

***Sympetrum sinaiticum***

Previously incorrectly called *S. decoloratum* and the individuals in Europe treated as the subspecies *S. d. sinaiticum* [49], but according to Dijkstra and Lewington [50] *S. sinaiticum* is now considered a good species on its own.

***Sympetrum vulgatum decoloratum***

*S. decoloratum* used to be considered a good species which included *sinaiticum* as a subspecies [49], but according to Dijkstra and Lewington [50] *decoloratum* is now considered to be a subspecies of *S. vulgatum* and *sinaiticum* a good species on its own. *S. v. decoloratum* occurs in Turkey where nominate form *S. vulgatum* on the other hand does not occur and *decoloratum* is thus included within the distribution maps of *Sympetrum vulgatum* from both 1988 and 2010. The distribution map *decolora* only includes the North African range which was believed to be the subspecies *Sympetrum decoloratum sinaiticum*, whereas *Sympetrum vulgatum* was considered to be the one occurring in Turkey. There is no specific distribution map available for *decoloratum* in 2010 where its Turkish range is included within the *Sympetrum vulgatum* range.

---

**Table S2.** Data for the analysis of range shift in European dragonfly (Odonata) species included in analysis ( $n = 123$ ). The list includes taxonomic suborder and scientific names of all species included in the analysis of range shift and changes in species richness 1988–2010. Also presented are the per species biogeographic group, range shift trend, relative change in range (percent change in number of occupied  $100 \times 100$  km grid cells), distance of shift in northern, southern, eastern, and western range margins, and direction of shift in range centroid and distance of shift in range centroid. See methods for detailed descriptions of the entries on this table. \* Indicate the four species that in 2010 were included as new in Europe. Nomenclature and taxonomy follow IUCN [80].

| Suborder  | Species                                               | Biogeographical group | Range shift trend | Range shift (%) | Range shift north border (km) | Range shift south border (km) | Range shift east border (km) | Range shift west border (km) | Range shift Compass direction (°) | Range shift Compass distance (km) |
|-----------|-------------------------------------------------------|-----------------------|-------------------|-----------------|-------------------------------|-------------------------------|------------------------------|------------------------------|-----------------------------------|-----------------------------------|
| Zygoptera | <i>Calopteryx haemorrhoidalis</i> Vander Linden, 1825 | Mediterranean         | Expansion         | 9               | 130                           | 0                             | 0                            | 0                            | 69                                | 106                               |
| Zygoptera | <i>Calopteryx splendens</i> Harris, 1780              | Eurasian              | Expansion         | 8               | 4                             | 0                             | 0                            | 77                           | 292                               | 14                                |
| Zygoptera | <i>Calopteryx virgo</i> Linnaeus, 1758                | Eurasian              | Expansion         | 7               | −62                           | 23                            | 0                            | 45                           | 270                               | 99                                |
| Zygoptera | <i>Calopteryx xanthostoma</i> Charpentier, 1825       | Mediterranean         | Contraction       | −5              | −45                           | −1                            | 50                           | 0                            | 239                               | 41                                |
| Zygoptera | <i>Ceriagrion georgifreyi</i> Schmidt, 1953           | Mediterranean         | Expansion         | 17              | 299                           | 3                             | −4                           | 739                          | 281                               | 152                               |
| Zygoptera | <i>Ceriagrion tenellum</i> De Villers, 1789           | Mediterranean         | Expansion         | 12              | 226                           | 0                             | 0                            | 0                            | 10                                | 125                               |
| Zygoptera | <i>Chalcolestes viridis</i> Vander Linden, 1825       | Mediterranean         | Expansion         | 8               | 290                           | 0                             | 0                            | 0                            | 31                                | 60                                |
| Zygoptera | <i>Coenagrion armatum</i> Charpentier, 1840           | Boreo-alpine          | Expansion         | 10              | 236                           | −112                          | −82                          | −238                         | 326                               | 248                               |
| Zygoptera | <i>Coenagrion caerulescens</i> Fonscolombe, 1838      | Mediterranean         | Expansion         | 12              | 21                            | 0                             | 0                            | 0                            | 293                               | 90                                |
| Zygoptera | <i>Coenagrion hastulatum</i> Charpentier, 1825        | Boreo-alpine          | Expansion         | 0               | −9                            | 12                            | −159                         | −61                          | 254                               | 73                                |
| Zygoptera | <i>Coenagrion hylas</i> Trybom, 1889                  | Boreo-alpine          | Stable            | 0               | 0                             | 0                             | 0                            | 0                            | NA                                | 0                                 |
| Zygoptera | <i>Coenagrion intermedium</i> Lohmann, 1990           | Mediterranean         | Stable            | 0               | −1                            | 0                             | 0                            | 0                            | NA                                | 0                                 |
| Zygoptera | <i>Coenagrion johanssoni</i> Wallengren, 1894         | Boreo-alpine          | Expansion         | 25              | 0                             | 232                           | 144                          | −119                         | 133                               | 175                               |
| Zygoptera | <i>Coenagrion lunulatum</i> Charpentier, 1840         | Boreo-alpine          | Contraction       | −2              | 37                            | 85                            | −140                         | 81                           | 322                               | 258                               |
| Zygoptera | <i>Coenagrion mercuriale</i> Charpentier, 1840        | Mediterranean         | Expansion         | 6               | −46                           | −14                           | −414                         | 0                            | 30                                | 167                               |
| Zygoptera | <i>Coenagrion ornatum</i> Selys, 1850                 | Mediterranean         | Expansion         | 90              | 520                           | 214                           | 0                            | 292                          | 359                               | 156                               |
| Zygoptera | <i>Coenagrion puella</i> Linnaeus, 1758               | Mediterranean         | Expansion         | 9               | 97                            | 23                            | 0                            | 0                            | 51                                | 46                                |

|            |                                                  |               |             |     |      |     |      |      |     |     |
|------------|--------------------------------------------------|---------------|-------------|-----|------|-----|------|------|-----|-----|
| Zygoptera  | <i>Coenagrion pulchellum</i> Vander Linden, 1825 | Eurasian      | Expansion   | 7   | 122  | 115 | -47  | 230  | 198 | 24  |
| Zygoptera  | <i>Coenagrion scitulum</i> Rambur, 1842          | Mediterranean | Expansion   | 123 | 2    | 0   | 0    | 122  | 310 | 203 |
| Zygoptera  | <i>Enallagma cyathigerum</i> Charpentier, 1840   | Eurasian      | Expansion   | 9   | -97  | 153 | 0    | 0    | 202 | 128 |
| Zygoptera  | <i>Epallage fatime</i> Charpentier, 1840         | Mediterranean | Expansion   | 11  | -526 | 78  | 0    | -152 | 254 | 125 |
| Zygoptera  | <i>Erythromma lindenii</i> Selys, 1840           | Mediterranean | Expansion   | 28  | 158  | 0   | 70   | 0    | 43  | 218 |
| Zygoptera  | <i>Erythromma najas</i> Hanseemann, 1823         | Eurasian      | Expansion   | 16  | 2    | 237 | 0    | 31   | 203 | 15  |
| Zygoptera  | <i>Erythromma viridulum</i> Charpentier, 1840    | Mediterranean | Expansion   | 50  | 350  | 73  | 0    | 0    | 78  | 184 |
| Zygoptera  | <i>Ischnura elegans</i> Vander Linden, 1820      | Eurasian      | Expansion   | 10  | 129  | 0   | 0    | 133  | 253 | 133 |
| Zygoptera  | <i>Ischnura fountaineae</i> * Morton, 1905       | Mediterranean | Expansion   | 100 | NA   | NA  | NA   | NA   | NA  | NA  |
| Zygoptera  | <i>Ischnura genei</i> Rambur, 1842               | Mediterranean | Stable      | 0   | 0    | 0   | 0    | 0    | NA  | 0   |
| Zygoptera  | <i>Ischnura graellsii</i> Rambur, 1842           | Mediterranean | Expansion   | 4   | 0    | 0   | 67   | 0    | 72  | 16  |
| Zygoptera  | <i>Ischnura pumilio</i> Charpentier, 1825        | Mediterranean | Expansion   | 33  | 51   | 0   | 0    | 167  | 318 | 176 |
| Zygoptera  | <i>Lestes barbarus</i> Fabricius, 1798           | Mediterranean | Expansion   | 7   | 224  | 0   | 0    | 0    | 349 | 49  |
| Zygoptera  | <i>Lestes dryas</i> Kirby, 1890                  | Eurasian      | Expansion   | 9   | 129  | 57  | 0    | -1   | 113 | 95  |
| Zygoptera  | <i>Lestes macrostigma</i> Eversmann, 1836        | Mediterranean | Contraction | -16 | 172  | 22  | 0    | 184  | 36  | 238 |
| Zygoptera  | <i>Lestes sponsa</i> Hanseemann, 1823            | Eurasian      | Expansion   | 13  | 118  | 73  | 0    | 32   | 184 | 131 |
| Zygoptera  | <i>Lestes virens</i> Charpentier, 1825           | Eurasian      | Expansion   | 31  | 503  | 18  | 0    | 0    | 74  | 208 |
| Zygoptera  | <i>Nehalennia speciosa</i> Charpentier, 1840     | Boreo-alpine  | Contraction | -2  | 13   | -92 | -57  | 27   | 329 | 55  |
| Zygoptera  | <i>Platycnemis acutipennis</i> Selys, 1841       | Mediterranean | Expansion   | 6   | 0    | 0   | 94   | 0    | 32  | 28  |
| Zygoptera  | <i>Platycnemis latipes</i> Rambur, 1842          | Mediterranean | Contraction | -11 | -252 | 0   | -14  | 0    | 216 | 67  |
| Zygoptera  | <i>Platycnemis pennipes</i> Pallas, 1771         | Eurasian      | Contraction | -1  | 81   | -94 | 0    | 0    | 341 | 49  |
| Zygoptera  | <i>Pyrrhosoma nymphula</i> Sulzer, 1776          | Eurasian      | Expansion   | 6   | 12   | 0   | 0    | 0    | 13  | 43  |
| Zygoptera  | <i>Sympecma fusca</i> Vander Linden, 1820        | Mediterranean | Contraction | -2  | 267  | 0   | 0    | 1    | 224 | 111 |
| Zygoptera  | <i>Sympecma paedisca</i> Brauer, 1877            | Boreo-alpine  | Expansion   | 21  | 474  | -55 | -136 | -48  | 298 | 284 |
| Anisoptera | <i>Aeshna affinis</i> Vander Linden, 1820        | Mediterranean | Expansion   | 65  | 562  | 73  | 0    | 0    | 23  | 284 |
| Anisoptera | <i>Aeshna caerulea</i> Ström, 1783               | Boreo-alpine  | Expansion   | 8   | 0    | -28 | -8   | 39   | 172 | 61  |
| Anisoptera | <i>Aeshna crenata</i> Hagen, 1856                | Boreo-alpine  | Expansion   | 117 | 229  | 517 | 7    | 46   | 313 | 54  |

|            |                                                 |               |             |     |      |      |      |      |     |     |
|------------|-------------------------------------------------|---------------|-------------|-----|------|------|------|------|-----|-----|
| Anisoptera | <i>Aeshna cyanea</i> Müller, 1764               | Eurasian      | Contraction | -1  | 15   | 0    | -70  | 0    | 269 | 76  |
| Anisoptera | <i>Aeshna grandis</i> Linnaeus, 1758            | Eurasian      | Expansion   | 12  | -63  | 25   | 6    | 60   | 180 | 115 |
| Anisoptera | <i>Aeshna isoceles</i> (Müller, 1767)           | Mediterranean | Expansion   | 33  | 777  | 13   | 0    | 0    | 32  | 329 |
| Anisoptera | <i>Aeshna juncea</i> Linnaeus, 1758             | Boreo-alpine  | Expansion   | 7   | -37  | -68  | -226 | -59  | 202 | 78  |
| Anisoptera | <i>Aeshna mixta</i> Latreille, 1805             | Mediterranean | Expansion   | 21  | 670  | 96   | 0    | 0    | 17  | 118 |
| Anisoptera | <i>Aeshna serrata</i> Hagen, 1856               | Eurasian      | Expansion   | 21  | 119  | 32   | -78  | 104  | 307 | 160 |
| Anisoptera | <i>Aeshna subarctica</i> Walker, 1908           | Boreo-alpine  | Expansion   | 23  | -72  | 114  | -126 | 12   | 280 | 235 |
| Anisoptera | <i>Aeshna viridis</i> Eversmann, 1836           | Eurasian      | Expansion   | 9   | 42   | 161  | 11   | 75   | 289 | 93  |
| Anisoptera | <i>Anax imperator</i> Leach, 1815               | Mediterranean | Expansion   | 16  | 477  | -23  | 0    | 0    | 5   | 116 |
| Anisoptera | <i>Anax parthenope</i> Selys, 1839              | Mediterranean | Expansion   | 38  | 806  | 0    | 0    | 170  | 295 | 321 |
| Anisoptera | <i>Boyeria cretensis</i> Peters, 1991           | Mediterranean | Expansion   | 100 | 3    | 15   | 176  | 24   | 90  | 72  |
| Anisoptera | <i>Boyeria irene</i> Fonscolombe, 1838          | Mediterranean | Expansion   | 39  | 151  | 0    | 113  | 0    | 303 | 36  |
| Anisoptera | <i>Brachythemis impartita</i> Karsch, 1890      | Tropical      | Expansion   | 72  | -4   | 57   | -18  | 54   | 41  | 130 |
| Anisoptera | <i>Brachytron pratense</i> Müller, 1764         | Eurasian      | Expansion   | 12  | 32   | 101  | 0    | 129  | 266 | 68  |
| Anisoptera | <i>Caliaeschna microstigma</i> Schneider, 1845  | Mediterranean | Expansion   | 20  | -62  | -19  | 0    | 170  | 326 | 57  |
| Anisoptera | <i>Cordulegaster bidentata</i> Selys, 1843      | Mediterranean | Expansion   | 87  | 149  | -48  | 186  | 57   | 94  | 196 |
| Anisoptera | <i>Cordulegaster boltonii</i> Donovan, 1807     | Eurasian      | Contraction | -8  | 116  | 0    | -317 | 0    | 253 | 296 |
| Anisoptera | <i>Cordulegaster helladica</i> Lohmann, 1993    | Mediterranean | Expansion   | 140 | 32   | 162  | 145  | 110  | 218 | 72  |
| Anisoptera | <i>Cordulegaster heros</i> Theischinger, 1979   | Mediterranean | Expansion   | 453 | 82   | 150  | 247  | 104  | 124 | 280 |
| Anisoptera | <i>Cordulegaster insignis</i> Schneider, 1845   | Mediterranean | Contraction | -18 | -459 | 0    | -70  | 71   | 201 | 203 |
| Anisoptera | <i>Cordulegaster picta</i> Selys, 1854          | Mediterranean | Expansion   | 18  | -294 | 119  | 0    | -788 | 113 | 223 |
| Anisoptera | <i>Cordulegaster trinacriae</i> Waterston, 1976 | Mediterranean | Expansion   | 5   | -8   | -47  | 53   | 0    | 105 | 59  |
| Anisoptera | <i>Cordulia aenea</i> Linnaeus, 1758            | Eurasian      | Expansion   | 28  | 219  | 105  | 0    | 22   | 185 | 31  |
| Anisoptera | <i>Crocothemis erythraea</i> Brullé, 1832       | Tropical      | Expansion   | 44  | 326  | -23  | 70   | 0    | 31  | 408 |
| Anisoptera | <i>Diplacodes lefebvrii</i> Rambur, 1842        | Tropical      | Expansion   | 45  | 11   | -1   | 14   | 37   | 350 | 53  |
| Anisoptera | <i>Epitheca bimaculata</i> Charpentier, 1825    | Eurasian      | Expansion   | 25  | -45  | 79   | -107 | 196  | 252 | 401 |
| Anisoptera | <i>Gomphus flavipes</i> Selys, 1837             | Eurasian      | Expansion   | 23  | 651  | -196 | 0    | 112  | 317 | 248 |

|            |                                                  |               |             |     |      |     |      |      |     |     |
|------------|--------------------------------------------------|---------------|-------------|-----|------|-----|------|------|-----|-----|
| Anisoptera | <i>Gomphus graslinii</i> Rambur, 1842            | Mediterranean | Expansion   | 182 | 106  | 72  | 11   | 249  | 247 | 452 |
| Anisoptera | <i>Gomphus pulchellus</i> Selys, 1840            | Mediterranean | Expansion   | 20  | 55   | 0   | -226 | 0    | 45  | 194 |
| Anisoptera | <i>Gomphus schneiderii</i> Selys, 1850           | Mediterranean | Expansion   | 37  | 0    | 19  | 0    | -9   | 283 | 114 |
| Anisoptera | <i>Gomphus simillimus</i> Selys, 1840            | Mediterranean | Expansion   | 11  | -194 | 0   | -74  | 0    | 45  | 99  |
| Anisoptera | <i>Gomphus vulgatissimus</i> Linnaeus, 1758      | Eurasian      | Expansion   | 26  | 105  | 168 | 0    | 20   | 203 | 186 |
| Anisoptera | <i>Leucorrhinia albifrons</i> Burmeister, 1839   | Boreo-alpine  | Contraction | -9  | 61   | 264 | -310 | 183  | 271 | 497 |
| Anisoptera | <i>Leucorrhinia caudalis</i> Charpentier, 1840   | Boreo-alpine  | Expansion   | 21  | -72  | 327 | -104 | 431  | 293 | 219 |
| Anisoptera | <i>Leucorrhinia dubia</i> Vander Linden, 1825    | Eurasian      | Expansion   | 5   | -73  | -31 | -175 | 43   | 243 | 150 |
| Anisoptera | <i>Leucorrhinia pectoralis</i> Charpentier, 1825 | Eurasian      | Expansion   | 65  | 61   | 225 | -52  | 263  | 267 | 342 |
| Anisoptera | <i>Leucorrhinia rubicunda</i> Linnaeus, 1758     | Boreo-alpine  | Expansion   | 7   | 15   | -44 | -119 | 199  | 259 | 143 |
| Anisoptera | <i>Libellula depressa</i> Linnaeus, 1758         | Eurasian      | Expansion   | 4   | -3   | 57  | 0    | 0    | 351 | 15  |
| Anisoptera | <i>Libellula fulva</i> Müller, 1764              | Eurasian      | Expansion   | 19  | 153  | 68  | 0    | 178  | 160 | 10  |
| Anisoptera | <i>Libellula quadrimaculata</i> Linnaeus, 1758   | Eurasian      | Expansion   | 9   | -283 | 9   | 0    | 65   | 63  | 60  |
| Anisoptera | <i>Lindenia tetraphylla</i> Vander Linden, 1825  | Mediterranean | Contraction | -21 | 30   | -98 | 241  | -784 | 260 | 223 |
| Anisoptera | <i>Macromia splendens</i> Pictet, 1843           | Mediterranean | Expansion   | 117 | 64   | 56  | -27  | 70   | 252 | 424 |
| Anisoptera | <i>Onychogomphus costae</i> Selys, 1885          | Mediterranean | Expansion   | 100 | 192  | 164 | 26   | -37  | 228 | 125 |
| Anisoptera | <i>Onychogomphus forcipatus</i> Linnaeus, 1758   | Mediterranean | Expansion   | 21  | 172  | 0   | -70  | 0    | 289 | 151 |
| Anisoptera | <i>Onychogomphus uncatus</i> Charpentier, 1840   | Mediterranean | Expansion   | 16  | -104 | 57  | 163  | 0    | 8   | 11  |
| Anisoptera | <i>Ophiogomphus cecilia</i> Fourcroy, 1785       | Eurasian      | Expansion   | 3   | -62  | 230 | -227 | 125  | 261 | 181 |
| Anisoptera | <i>Orthetrum albistylum</i> Selys, 1848          | Mediterranean | Expansion   | 37  | 404  | 0   | 0    | 77   | 317 | 147 |
| Anisoptera | <i>Orthetrum brunneum</i> Fonscolombe, 1837      | Mediterranean | Expansion   | 19  | 349  | 0   | 0    | 0    | 19  | 172 |
| Anisoptera | <i>Orthetrum cancellatum</i> Linnaeus, 1758      | Mediterranean | Expansion   | 10  | -31  | 0   | 0    | 190  | 277 | 128 |
| Anisoptera | <i>Orthetrum chrysostigma</i> Burmeister, 1839   | Tropical      | Expansion   | 131 | 351  | 0   | -3   | 198  | 289 | 459 |
| Anisoptera | <i>Orthetrum coerulescens</i> Fabricius, 1798    | Mediterranean | Expansion   | 9   | 139  | 0   | -70  | 0    | 329 | 212 |
| Anisoptera | <i>Orthetrum nitidinerve</i> Selys, 1841         | Mediterranean | Expansion   | 139 | 202  | 0   | 4    | 147  | 278 | 931 |
| Anisoptera | <i>Orthetrum sabina</i> * Drury, 1773            | Tropical      | Expansion   | 100 | NA   | NA  | NA   | NA   | NA  | NA  |
| Anisoptera | <i>Orthetrum taeniolatum</i> * Schneider, 1845   | Tropical      | Expansion   | 100 | NA   | NA  | NA   | NA   | NA  | NA  |

|            |                                                       |               |             |     |      |      |      |      |     |      |
|------------|-------------------------------------------------------|---------------|-------------|-----|------|------|------|------|-----|------|
| Anisoptera | <i>Orthetrum trinacria</i> Selys, 1841                | Tropical      | Expansion   | 257 | 127  | 151  | 11   | 160  | 270 | 839  |
| Anisoptera | <i>Oxygastra curtisii</i> Dale, 1834                  | Mediterranean | Contraction | −4  | −372 | 40   | 138  | 57   | 68  | 130  |
| Anisoptera | <i>Pantala flavescens</i> Fabricius, 1798             | Tropical      | Expansion   | 600 | 498  | 206  | −43  | 995  | 297 | 370  |
| Anisoptera | <i>Paragomphus genei</i> Selys, 1841                  | Tropical      | Expansion   | 33  | 27   | 0    | 43   | 37   | 276 | 1081 |
| Anisoptera | <i>Selysiothemis nigra</i> Vander Linden, 1825        | Mediterranean | Expansion   | 216 | 626  | 23   | 267  | 314  | 295 | 327  |
| Anisoptera | <i>Somatochlora alpestris</i> Selys, 1840             | Boreo-alpine  | Expansion   | 18  | −9   | −7   | 66   | −20  | 356 | 105  |
| Anisoptera | <i>Somatochlora arctica</i> Zetterstedt, 1840         | Boreo-alpine  | Expansion   | 41  | 31   | −8   | 29   | 60   | 195 | 213  |
| Anisoptera | <i>Somatochlora flavomaculata</i> Vander Linden, 1825 | Eurasian      | Expansion   | 46  | 432  | 162  | 0    | 127  | 225 | 190  |
| Anisoptera | <i>Somatochlora meridionalis</i> Nielsen, 1935        | Mediterranean | Expansion   | 92  | 393  | 121  | 80   | 156  | 330 | 184  |
| Anisoptera | <i>Somatochlora metallica</i> Vander Linden, 1825     | Eurasian      | Contraction | 1   | −84  | 133  | 0    | 0    | 183 | 14   |
| Anisoptera | <i>Somatochlora sahlbergi</i> Trybom, 1889            | Boreo-alpine  | Expansion   | 22  | 12   | 70   | 44   | 177  | 295 | 89   |
| Anisoptera | <i>Sympetrum danae</i> Sulzer, 1776                   | Eurasian      | Expansion   | 5   | 53   | 2    | 26   | 0    | 233 | 145  |
| Anisoptera | <i>Sympetrum depressiusculum</i> Selys, 1841          | Eurasian      | Expansion   | 120 | 782  | 187  | 0    | 551  | 285 | 269  |
| Anisoptera | <i>Sympetrum flaveolum</i> Linnaeus, 1758             | Eurasian      | Expansion   | 6   | 129  | 8    | 0    | 11   | 332 | 138  |
| Anisoptera | <i>Sympetrum fonscolombii</i> Selys, 1840             | Tropical      | Expansion   | 33  | 46   | −1   | 0    | 0    | 0   | 278  |
| Anisoptera | <i>Sympetrum meridionale</i> Selys, 1841              | Mediterranean | Expansion   | 46  | 211  | 0    | 0    | 0    | 338 | 315  |
| Anisoptera | <i>Sympetrum pedemontanum</i> O.F.Müller, 1766        | Eurasian      | Expansion   | 85  | 533  | −152 | −112 | −435 | 312 | 267  |
| Anisoptera | <i>Sympetrum sanguineum</i> Müller, 1764              | Eurasian      | Expansion   | 10  | 44   | −29  | 0    | 102  | 261 | 107  |
| Anisoptera | <i>Sympetrum sinaiticum</i> Dumont, 1977              | Mediterranean | Expansion   | 475 | 70   | 446  | 92   | 670  | 239 | 344  |
| Anisoptera | <i>Sympetrum striolatum</i> Charpentier, 1840         | Eurasian      | Expansion   | 3   | 39   | −23  | 0    | 0    | 8   | 32   |
| Anisoptera | <i>Sympetrum vulgatum</i> Linnaeus, 1758              | Eurasian      | Expansion   | 15  | 95   | 60   | 0    | 475  | 271 | 174  |
| Anisoptera | <i>Trithemis annulate</i> Palisot de Beauvois, 1807   | Tropical      | Expansion   | 145 | 378  | 96   | 42   | 0    | 7   | 179  |
| Anisoptera | <i>Trithemis festiva</i> Rambur, 1842                 | Tropical      | Expansion   | 133 | 192  | 0    | 101  | 0    | 22  | 121  |
| Anisoptera | <i>Trithemis kirbyi</i> * Selys, 1891                 | Tropical      | Expansion   | 100 | NA   | NA   | NA   | NA   | NA  | NA   |
| Anisoptera | <i>Zygonyx torridus</i> Kirby, 1889                   | Tropical      | Expansion   | 217 | 64   | 38   | 2551 | 262  | 72  | 178  |

**Table S3.** Summary statistics of range shifts in taxonomic suborders for European dragonfly (Odonata) species. Measures of range shift for species from 1988 to 2010. Damselflies (Zygoptera) and true dragonflies (Anisoptera) used as unmatched groups in a Mann–Whitney–Wilcoxon test. SD = standard deviation,  $n$  = sample size, df = degrees of freedom,  $W$  = Wilcoxon test statistic, and  $p$ -value = statistical test score. Bold font indicates significant variables at  $\alpha = 0.05$ .

|                                        | Zygoptera       | Anisoptera      | $n$ | df | $W$  | $p$ -value         |
|----------------------------------------|-----------------|-----------------|-----|----|------|--------------------|
|                                        | Mean $\pm$ 1 SD | Mean $\pm$ 1 SD |     |    |      |                    |
| Shift in range (%)                     | 16 $\pm$ 28     | 65 $\pm$ 105    | 123 | 1  | 2453 | <b>&lt; 0.0000</b> |
| Shift in range: margin north (km)      | 91 $\pm$ 193    | 131 $\pm$ 252   | 119 | 1  | 1666 | 0.6305             |
| Shift in range: margin south (km)      | 26 $\pm$ 76     | 56 $\pm$ 113    | 119 | 1  | 1784 | 0.2473             |
| Shift in range: margin east (km)       | -16 $\pm$ 85    | 30 $\pm$ 306    | 119 | 1  | 1772 | 0.2604             |
| Shift in range: margin west (km)       | 38 $\pm$ 146    | 77 $\pm$ 225    | 119 | 1  | 2033 | <b>0.0092</b>      |
| Shift in range centroid: distance (km) | 110 $\pm$ 80    | 210 $\pm$ 189   | 116 | 1  | 2179 | <b>0.0008</b>      |
| Shift in range centroid: direction (°) | 192 $\pm$ 117   | 207 $\pm$ 110   | 116 | 1  | 1530 | 0.6871             |

**Table S4.** Summary statistics of range shifts in biogeographical groups for European dragonfly (Odonata) species. Measures of range shift in species from 1988 to 2010 for all species (All), damselfly (Zygoptera) species and true dragonfly (Anisoptera) species, respectively. Biogeographic groups: Tropical, Mediterranean, Eurasian, and Boreo-alpine used as unmatched groups in a Kruskal–Wallis test. SD = standard deviation,  $n$  = sample size, df = degrees of freedom, H = Kruskal–Wallis test statistic, and  $p$ -value = statistical test score Bold font indicates significant variables at  $\alpha = 0.05$ .

|                                        | Species    | Tropical        | Mediterranean   | Eurasian        | Boreo-alpine    | $n$ | df | H     | $p$ -value         |
|----------------------------------------|------------|-----------------|-----------------|-----------------|-----------------|-----|----|-------|--------------------|
|                                        |            | Mean $\pm$ 1 SD |     |    |       |                    |
| Shift in range (%)                     | All        | 144 $\pm$ 147   | 54 $\pm$ 95     | 18 $\pm$ 25     | 18 $\pm$ 29     | 123 | 3  | 27.34 | <b>&lt; 0.0000</b> |
|                                        | Zygoptera  | NA              | 21 $\pm$ 36     | 11 $\pm$ 8      | 8 $\pm$ 12      | 41  | 2  | 0.79  | 0.6736             |
|                                        | Anisoptera | 144 $\pm$ 147   | 77 $\pm$ 115    | 22 $\pm$ 29     | 26 $\pm$ 35     | 82  | 3  | 24.16 | <b>&lt; 0.0000</b> |
| Shift in range: margin north (km)      | All        | 183 $\pm$ 176   | 130 $\pm$ 274   | 110 $\pm$ 218   | 53 $\pm$ 138    | 119 | 3  | 5.27  | 0.1533             |
|                                        | Zygoptera  | NA              | 88 $\pm$ 218    | 86 $\pm$ 160    | 107 $\pm$ 183   | 40  | 2  | 0.14  | 0.9347             |
|                                        | Anisoptera | 183 $\pm$ 176   | 158 $\pm$ 306   | 120 $\pm$ 241   | 16 $\pm$ 86     | 79  | 3  | 5.80  | 0.1218             |
| Shift in range: margin south (km)      | All        | 48 $\pm$ 74     | 33 $\pm$ 80     | 55 $\pm$ 99     | 71 $\pm$ 171    | 119 | 3  | 3.73  | 0.2918             |
|                                        | Zygoptera  | NA              | 18 $\pm$ 49     | 53 $\pm$ 90     | 10 $\pm$ 119    | 40  | 2  | 3.23  | 0.199              |
|                                        | Anisoptera | 48 $\pm$ 74     | 42 $\pm$ 95     | 55 $\pm$ 105    | 114 $\pm$ 194   | 79  | 3  | 1.25  | 0.741              |
| Shift in range: margin east (km)       | All        | 252 $\pm$ 764   | 23 $\pm$ 105    | -32 $\pm$ 73    | -69 $\pm$ 114   | 119 | 3  | 15.76 | <b>0.0013</b>      |
|                                        | Zygoptera  | NA              | -7 $\pm$ 95     | -4 $\pm$ 14     | -62 $\pm$ 106   | 40  | 2  | 6.76  | <b>0.0340</b>      |
|                                        | Anisoptera | 252 $\pm$ 764   | 43 $\pm$ 107    | -44 $\pm$ 85    | -75 $\pm$ 124   | 79  | 3  | 12.31 | <b>0.0064</b>      |
| Shift in range: margin west (km)       | All        | 158 $\pm$ 292   | 43 $\pm$ 222    | 77 $\pm$ 153    | 42 $\pm$ 149    | 119 | 3  | 4.19  | 0.242              |
|                                        | Zygoptera  | NA              | 61 $\pm$ 176    | 50 $\pm$ 73     | -51 $\pm$ 105   | 40  | 2  | 4.71  | 0.0947             |
|                                        | Anisoptera | 158 $\pm$ 292   | 31 $\pm$ 250    | 89 $\pm$ 178    | 107 $\pm$ 144   | 79  | 3  | 2.37  | 0.4994             |
| Shift in range centroid: distance (km) | All        | 373 $\pm$ 322   | 171 $\pm$ 148   | 131 $\pm$ 99    | 164 $\pm$ 122   | 119 | 3  | 8.83  | <b>0.0316</b>      |
|                                        | Zygoptera  | NA              | 107 $\pm$ 73    | 85 $\pm$ 62     | 156 $\pm$ 113   | 40  | 2  | 2.29  | 0.3185             |
|                                        | Anisoptera | 373 $\pm$ 322   | 214 $\pm$ 170   | 151 $\pm$ 107   | 169 $\pm$ 134   | 79  | 3  | 6.66  | 0.0836             |
| Shift in range centroid: direction (°) | All        | 150 $\pm$ 142   | 177 $\pm$ 122   | 226 $\pm$ 86    | 269 $\pm$ 63    | 116 | 3  | 8.60  | <b>0.0351</b>      |
|                                        | Zygoptera  | NA              | 165 $\pm$ 128   | 195 $\pm$ 97    | 277 $\pm$ 76    | 37  | 2  | 4.63  | 0.0987             |
|                                        | Anisoptera | 150 $\pm$ 142   | 185 $\pm$ 119   | 239 $\pm$ 79    | 264 $\pm$ 58    | 79  | 3  | 4.56  | 0.2071             |

**Table S5.** Summary statistics of range margin shifts for European dragonfly (Odonata) species. Measures of range shift at the range margins in species from 1988 to 2010. Northern margin and the southern, eastern, and western margins combined (=other margins) used as unmatched groups in a Mann–Whitney–Wilcoxon test of all species (All), damselfly (Zygoptera) species and true dragonfly (Anisoptera) species, respectively, and for species in the biogeographical groups: Tropical, Mediterranean, Eurasian, and Boreo-alpine, respectively. SD = standard deviation, *n* = sample size, df = degrees of freedom, *W* = Wilcoxon test statistic, and *p*-value = statistical test score. Bold font indicates significant variables at  $\alpha = 0.05$ .

|               | North margin         | Other margins        | <i>n</i> | df | <i>W</i> | <i>p</i> -value    |
|---------------|----------------------|----------------------|----------|----|----------|--------------------|
|               | Mean $\pm$ 1 SD (km) | Mean $\pm$ 1 SD (km) |          |    |          |                    |
| All           | 118 $\pm$ 234        | 41 $\pm$ 197         | 119      | 1  | 26533    | <b>&lt; 0.0000</b> |
| Zygoptera     | 91 $\pm$ 193         | 16 $\pm$ 109         | 40       | 1  | 3229     | <b>0.0007</b>      |
| Anisoptera    | 131 $\pm$ 252        | 54 $\pm$ 229         | 79       | 1  | 11306    | <b>0.0055</b>      |
| Tropical      | 183 $\pm$ 176        | 153 $\pm$ 467        | 11       | 1  | 256      | <b>0.0457</b>      |
| Mediterranean | 130 $\pm$ 274        | 33 $\pm$ 148         | 55       | 1  | 5841     | <b>0.0010</b>      |
| Eurasian      | 110 $\pm$ 218        | 33 $\pm$ 122         | 36       | 1  | 2377     | <b>0.0438</b>      |
| Boreo-alpine  | 53 $\pm$ 138         | 14 $\pm$ 156         | 17       | 1  | 508      | 0.2977             |
